# Supplementary material for: Single-crystalline hexagonal ZnO microtube optical resonators
Source: Royal Society of Chemistry journal article supplement (doi:10.1039/c0jm00172d), 2010-01-01
Supplement: c0jm00172d.pdf [file c0jm00172d.pdf]

**Supplementary Material (ESI) for Journal of Materials Chemistry**

---

**Single-Crystalline Hexagonal ZnO Microtube Optical Resonators**

Hongxing Dong,<sup>a</sup> Zhanghai Chen,<sup>\*a</sup> Liaoxin Sun,<sup>a</sup> Wei Xie,<sup>a</sup> H. Hoe Tan,<sup>b</sup> Jian Lu,<sup>a</sup>

Chennupati Jagadish<sup>b</sup> and Xuechu Shen<sup>a</sup>

<sup>a</sup>*Surface Physics Laboratory, Department of Physics, Advanced Materials Laboratory, Fudan University, Shanghai  
200433, China.*

<sup>b</sup>*Department of Electronic Materials Engineering, Research School of Physics and Engineering, The Australian  
National University, Canberra, ACT 0200, Australia*

*\*Corresponding author: E-mail: zhanghai@fudan.edu.cn*

**Electronic Supplementary Information**

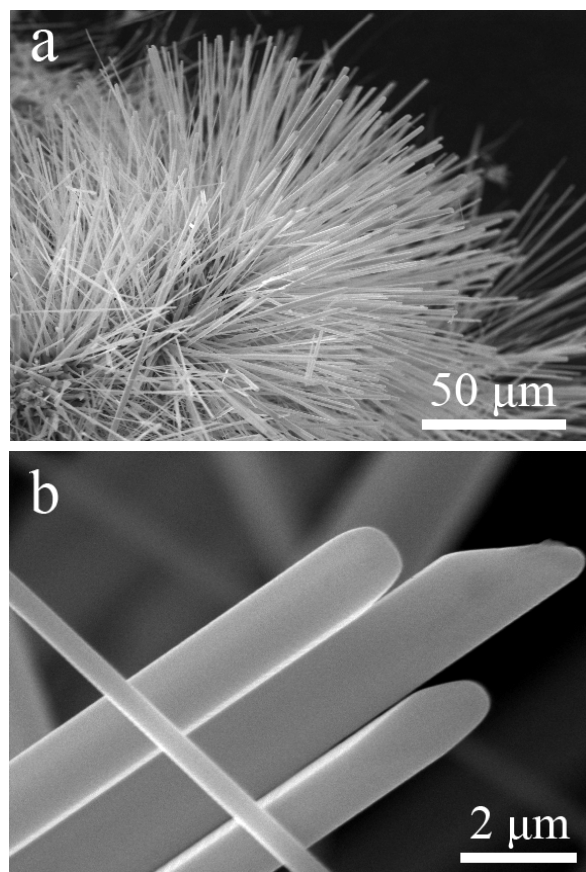

**Fig. S1** SEM images of ZnO nanowires grown at 1000 °C for 60 min in the unsealed quartz tube.

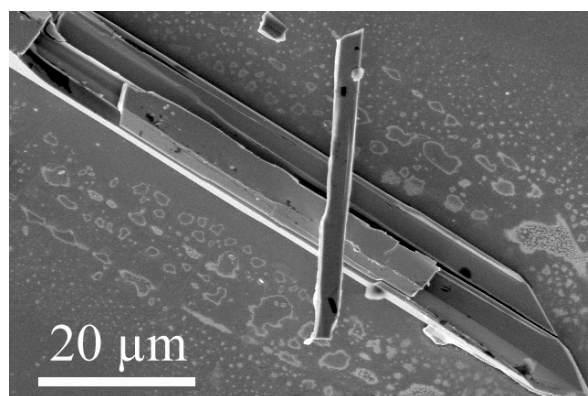

**Fig. S2** Typical SEM images of a single cracked ZnO microtube. It can be seen clearly that the wall thickness decrease continuously along the c-axis of the microtube.
